# Supplementary material for: Efficacy of Different Fungicide Spraying Techniques on the Infestation with Kabatiella zeae and Formation of Fusarium Mycotoxins in Forage Maize
Source: MDPI journal article supplement (doi:10.3390/agriculture13061269), 2023-06-19
Supplement: s1 [file s1]

## Supplementary Material

### Efficacy of Different Fungicide Spraying Techniques on the Infestation with *Kabatiella zae* and Formation of *Fusarium* Mycotoxins in Forage Maize

Tim Birr, Andreas Tillessen, Joseph-Alexander Verreet, Mario Hasler and Holger Klink

**Table S1.** Dry matter yield ( $\pm$  SD; dt/ha), DON and ZEN concentrations ( $\pm$  SD;  $\mu$ g/kg) in forage maize samples at silage maturity of the cultivar “SY Werena” in the two fungicide-untreated controls without (T1) and with (T2) silk channel inoculation of main ears with macroconidia of *Fusarium culmorum* seven days after silk emergence at BCCH 65 at the three trial locations Barkhorn, Hemdingen, and Hohenschulen.

| Treatment           | Barkhorn         |                      |                      | Hemdingen        |                      |                      | Hohenschulen     |                      |                      |
|---------------------|------------------|----------------------|----------------------|------------------|----------------------|----------------------|------------------|----------------------|----------------------|
|                     | Yield<br>(dt/ha) | DON<br>( $\mu$ g/kg) | ZEN<br>( $\mu$ g/kg) | Yield<br>(dt/ha) | DON<br>( $\mu$ g/kg) | ZEN<br>( $\mu$ g/kg) | Yield<br>(dt/ha) | DON<br>( $\mu$ g/kg) | ZEN<br>( $\mu$ g/kg) |
| T1 – Non-inoculated | 180.1 $\pm$ 9.1  | 2598 $\pm$ 776       | 498 $\pm$ 252        | 189.8 $\pm$ 8.4  | 4453 $\pm$ 2204      | 585 $\pm$ 192        | 131.1 $\pm$ 12.1 | 3834 $\pm$ 2640      | 478 $\pm$ 198        |
| T2 – Inoculated     | 176.4 $\pm$ 8.5  | 28,355 $\pm$ 4233    | 1966 $\pm$ 438       | 190.2 $\pm$ 6.5  | 14,992 $\pm$ 2368    | 2260 $\pm$ 791       | 136.8 $\pm$ 6.7  | 25,493 $\pm$ 4237    | 2254 $\pm$ 874       |

DON = deoxynivalenol; ZEN = zearalenone.

**Table S2.** Disease severities of *Kabatiella zae* ( $\pm$  SD; percentage of leaf area affected by symptoms) on the upper, middle (L-2 to L+2) and lower leaf segment of forage maize at BBCH 65, BBCH 75 and BBCH 85 of the cultivar “SY Werena” depending on different fungicide spraying techniques (treatments T2 – T5) at the three trial locations Barkhorn, Hemdingen, and Hohenschulen. Treatments: T2 – Fungicide-untreated control, T3 - Overhead spraying technique, T4 - Dropleg spraying technique, T5 - Combination of T3 and T4. The fungicide Prosaro® was applied (T3 – T5) with 1.0 L/ha and a spray volume of 400 L/ha at BBCH 65.

| Treatment                        | Leaf segment | Disease severity <i>K. zae</i> (%) |               |                |               |               |               |               |                |                |
|----------------------------------|--------------|------------------------------------|---------------|----------------|---------------|---------------|---------------|---------------|----------------|----------------|
|                                  |              | Barkhorn                           |               |                | Hemdingen     |               |               | Hohenschulen  |                |                |
|                                  |              | BBCH<br>65                         | BBCH<br>75    | BBCH<br>85     | BBCH<br>65    | BBCH<br>75    | BBCH<br>85    | BBCH<br>65    | BBCH<br>75     | BBCH<br>85     |
| T2 – Untreated control           | Upper        | 1.0 $\pm$ 0                        | 2.6 $\pm$ 0.1 | 13.6 $\pm$ 0.8 | 1.0 $\pm$ 0.1 | 2.6 $\pm$ 0.2 | 7.6 $\pm$ 0.9 | 1.6 $\pm$ 0.6 | 10.1 $\pm$ 4.1 | 25.6 $\pm$ 6.0 |
|                                  | Middle       | 1.1 $\pm$ 0.1                      | 1.9 $\pm$ 0.2 | 4.7 $\pm$ 0.2  | 1.9 $\pm$ 0.3 | 3.7 $\pm$ 0.8 | 4.6 $\pm$ 0.6 | 2.7 $\pm$ 1.5 | 6.1 $\pm$ 3.2  | 15.6 $\pm$ 1.9 |
|                                  | Lower        | 1.0 $\pm$ 0                        | 1.8 $\pm$ 0.2 | 3.4 $\pm$ 0.8  | 2.0 $\pm$ 0.2 | 3.4 $\pm$ 0.5 | 3.5 $\pm$ 0.5 | 1.7 $\pm$ 0.5 | 2.8 $\pm$ 0.6  | 4.5 $\pm$ 1.3  |
| T3 – Overhead spraying technique | Upper        | 1.0 $\pm$ 0                        | 1.4 $\pm$ 0.3 | 7.0 $\pm$ 1.5  | 1.0 $\pm$ 0   | 2.1 $\pm$ 0.1 | 4.5 $\pm$ 0.4 | 1.2 $\pm$ 0.3 | 3.0 $\pm$ 1.7  | 9.9 $\pm$ 3.5  |
|                                  | Middle       | 1.0 $\pm$ 0.1                      | 1.6 $\pm$ 0.2 | 2.6 $\pm$ 0.3  | 1.6 $\pm$ 0.3 | 2.8 $\pm$ 0.3 | 3.0 $\pm$ 0.3 | 1.7 $\pm$ 0.9 | 3.0 $\pm$ 1.8  | 6.7 $\pm$ 4.1  |
|                                  | Lower        | 1.0 $\pm$ 0                        | 1.5 $\pm$ 0.2 | 2.4 $\pm$ 0.1  | 1.8 $\pm$ 0.1 | 2.7 $\pm$ 0.2 | 2.8 $\pm$ 0.3 | 1.2 $\pm$ 0.3 | 2.2 $\pm$ 0.9  | 2.9 $\pm$ 0.9  |
| T4 – Dropleg spraying technique  | Upper        | 1.0 $\pm$ 0.1                      | 2.3 $\pm$ 0.3 | 14.2 $\pm$ 1.5 | 1.0 $\pm$ 0   | 2.4 $\pm$ 0.1 | 6.9 $\pm$ 0.2 | 1.3 $\pm$ 0.4 | 6.5 $\pm$ 2.4  | 13.9 $\pm$ 3.3 |
|                                  | Middle       | 1.0 $\pm$ 0                        | 1.6 $\pm$ 0.1 | 4.1 $\pm$ 0.6  | 1.5 $\pm$ 0.2 | 2.8 $\pm$ 0.3 | 3.1 $\pm$ 0.3 | 1.7 $\pm$ 0.5 | 2.9 $\pm$ 0.8  | 4.9 $\pm$ 1.8  |
|                                  | Lower        | 1.0 $\pm$ 0                        | 1.4 $\pm$ 0.2 | 2.5 $\pm$ 0.5  | 1.8 $\pm$ 0.2 | 2.5 $\pm$ 0.3 | 2.6 $\pm$ 0.3 | 1.2 $\pm$ 0.2 | 2.1 $\pm$ 0.7  | 2.9 $\pm$ 0.9  |
| T5 – Combination of T3 and T4    | Upper        | 0.9 $\pm$ 0.1                      | 1.3 $\pm$ 0.1 | 9.9 $\pm$ 1.3  | 1.0 $\pm$ 0   | 2.1 $\pm$ 0.1 | 4.0 $\pm$ 0.2 | 0.9 $\pm$ 0.2 | 2.5 $\pm$ 0.9  | 6.7 $\pm$ 1.7  |
|                                  | Middle       | 1.0 $\pm$ 0                        | 1.4 $\pm$ 0.1 | 2.7 $\pm$ 0.1  | 1.5 $\pm$ 0.2 | 2.5 $\pm$ 0.2 | 2.6 $\pm$ 0.2 | 1.3 $\pm$ 0.3 | 1.8 $\pm$ 0.7  | 4.6 $\pm$ 1.0  |
|                                  | Lower        | 1.0 $\pm$ 0                        | 1.0 $\pm$ 0.1 | 2.0 $\pm$ 0.1  | 1.5 $\pm$ 0.3 | 2.2 $\pm$ 0.2 | 2.3 $\pm$ 0.2 | 1.2 $\pm$ 0.2 | 1.6 $\pm$ 0.3  | 2.1 $\pm$ 0.4  |

**Table S3.** Dry matter yield ( $\pm$  SD; dt/ha) of forage maize of the cultivar “SY Werena” depending on different fungicide spraying techniques (treatments T2 – T5) at the three trial locations Barkhorn, Hemdingen, and Hohenschulen. Treatments: T2 – Fungicide-untreated control, T3 - Overhead spraying technique, T4 - Dropleg spraying technique, T5 - Combination of T3 and T4. The fungicide Prosaro® was applied (T3 – T5) with 1.0 L/ha and a spray volume of 400 L/ha at BBCH 65.

| Treatment                        | Dry matter yield (dt/ha) |                 |                  |
|----------------------------------|--------------------------|-----------------|------------------|
|                                  | Barkhorn                 | Hemdingen       | Hohenschulen     |
| T2 – Untreated control           | 176.4 $\pm$ 8.5          | 190.2 $\pm$ 6.5 | 136.8 $\pm$ 6.7  |
| T3 – Overhead spraying technique | 194.3 $\pm$ 9.0          | 200.7 $\pm$ 9.1 | 159.1 $\pm$ 11.7 |
| T4 – Dropleg spraying technique  | 192.5 $\pm$ 3.8          | 198.0 $\pm$ 4.5 | 151.9 $\pm$ 5.7  |
| T5 – Combination of T3 and T4    | 203.2 $\pm$ 7.7          | 205.3 $\pm$ 9.9 | 164.9 $\pm$ 9.3  |

**Table S4.** Concentrations of DON and ZEN ( $\pm$  SD;  $\mu$ g/kg) in forage maize samples at silage maturity of the cultivar “SY Werena” depending on different fungicide spraying techniques (treatments T1 – T5) at the three trial locations Barkhorn, Hemdingen, and Hohenschulen. Treatments: T1 – Fungicide-untreated control, T2 – Fungicide-untreated control, T3 - Overhead spraying technique, T4 - Dropleg spraying technique, T5 - Combination of T3 and T4. Treatments T2 to T5 were inoculated with macroconidia of *Fusarium culmorum* seven days after silk emergence by silk channel inoculation of forage maize main ears. Treatment T1 was not inoculated with *Fusarium* spores in order to measure the success of the silk channel inoculation by comparing DON and ZEN concentrations between the two fungicide untreated controls T1 and T2. The fungicide Prosaro® was applied (T3 – T5) with 1.0 L/ha and a spray volume of 400 L/ha two days after inoculation at BBCH 65.

| Treatment                                     | Mycotoxin | Mycotoxin concentration ( $\mu$ g/kg) |                   |                   |
|-----------------------------------------------|-----------|---------------------------------------|-------------------|-------------------|
|                                               |           | Barkhorn                              | Hemdingen         | Hohenschulen      |
| T1 - Untreated control <sup>1</sup>           | DON       | 2598 $\pm$ 776                        | 4453 $\pm$ 2204   | 3834 $\pm$ 2640   |
|                                               | ZEN       | 498 $\pm$ 252                         | 585 $\pm$ 192     | 478 $\pm$ 198     |
| T2 – Untreated control <sup>2</sup>           | DON       | 28,355 $\pm$ 4233                     | 14,992 $\pm$ 2368 | 25,493 $\pm$ 4237 |
|                                               | ZEN       | 1966 $\pm$ 438                        | 2260 $\pm$ 791    | 2254 $\pm$ 874    |
| T3 – Overhead spraying technique <sup>2</sup> | DON       | 12,354 $\pm$ 2062                     | 4716 $\pm$ 1891   | 14,557 $\pm$ 2400 |
|                                               | ZEN       | 991 $\pm$ 118                         | 649 $\pm$ 178     | 1424 $\pm$ 632    |
| T4 – Dropleg spraying technique <sup>2</sup>  | DON       | 7479 $\pm$ 1602                       | 1781 $\pm$ 763    | 3699 $\pm$ 2253   |
|                                               | ZEN       | 657 $\pm$ 306                         | 296 $\pm$ 78      | 592 $\pm$ 254     |
| T5 – Combination of T3 and T4 <sup>2</sup>    | DON       | 8102 $\pm$ 1883                       | 2233 $\pm$ 871    | 4727 $\pm$ 2468   |
|                                               | ZEN       | 556 $\pm$ 237                         | 261 $\pm$ 102     | 511 $\pm$ 371     |

<sup>1</sup> Without *Fusarium* inoculation. <sup>2</sup> With *Fusarium* inoculation seven days after silk emergence. DON = deoxynivalenol; ZEN = zearalenone.
